# Supplementary figures and images for: Using qualitative mixed methods to study small health care organizations while maximising trustworthiness and authenticity
Source: Springer Nature journal article supplement (doi:10.1186/s12913-014-0559-4), 2014-11-18

**Figure III. Exploratory, simultaneous, mixed QUAL-qual methods**

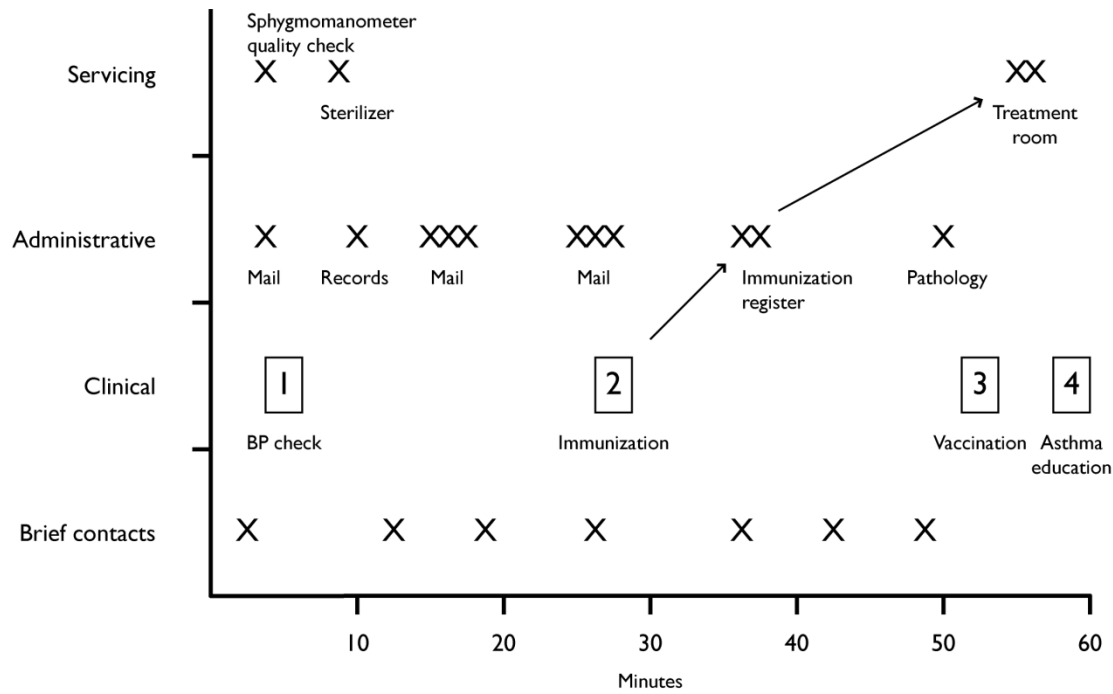

Supplement: MOESM3 [file 9756700]
